# Supplementary material
Source: publisher figshare collection journal article supplement (https://sage.figshare.com/ndownloader/files/22882145)
Supplement: Supplementary file 1 [file 22882145]

Supplementary Information

Table E. Full regression models to predict C1 x SVR and C2 x SVR with interaction between WHR and age,* Multi‐Ethnic Study of Atherosclerosis, 2000–2002

| **Variable** | **C1 x SVR (seconds)** | | | | **C2 x SVR (seconds)** | | | |
| --- | --- | --- | --- | --- | --- | --- | --- | --- |
| **Estimate (95% CI)** | | | **P-Value** | **Estimate (95% CI)** | | | **P-Value** |
| Intercept | 2.909 | (2.750 - | 3.069) | < 0.001 | 0.830 | (0.757 - | 0.902) | < 0.001 |
| Male | 0.303 | (0.272 - | 0.334) | < 0.001 | 0.135 | (0.121 - | 0.149) | < 0.001 |
| Race/Ethnicity |  |  |  |  |  |  |  |  |
| Chinese-American | 0.046 | (-0.005 - | 0.096) | 0.075 | -0.024 | (-0.047 - | -0.001) | 0.040 |
| African-American | 0.067 | (0.031 - | 0.103) | < 0.001 | -0.020 | (-0.036 - | -0.004) | 0.016 |
| Hispanic | -0.009 | (-0.051 - | 0.034) | 0.681 | -0.025 | (-0.045 - | -0.006) | 0.010 |
| Education |  |  |  |  |  |  |  |  |
| Some College | -0.036 | (-0.070 - | -0.002) | 0.038 | 0.009 | (-0.006 - | 0.025) | 0.244 |
| College Graduation | 0.005 | (-0.036 - | 0.046) | 0.803 | 0.045 | (0.027 - | 0.064) | < 0.001 |
| Post-graduate | 0.006 | (-0.035 - | 0.048) | 0.763 | 0.046 | (0.027 - | 0.065) | < 0.001 |
| Cigarette smoking |  |  |  |  |  |  |  |  |
| Former | 0.003 | (-0.026 - | 0.032) | 0.832 | -0.013 | (-0.026 - | 0.000) | 0.054 |
| Current | -0.012 | (-0.053 - | 0.030) | 0.584 | -0.085 | (-0.104 - | -0.066) | < 0.001 |
| Taking medications for diabetes | -0.066 | (-0.118 - | -0.013) | 0.014 | 0.005 | (-0.020 - | 0.029) | 0.712 |
| Taking medications for cholesterol | 0.012 | (-0.025 - | 0.049) | 0.532 | -0.006 | (-0.023 - | 0.011) | 0.476 |
| Taking medications for hypertension | 0.034 | (0.003 - | 0.065) | 0.029 | -0.003 | (-0.017 - | 0.011) | 0.713 |
| Systolic Blood Pressure (mmHg) | -0.003 | (-0.004 - | -0.003) | < 0.001 | -0.002 | (-0.002 - | -0.001) | < 0.001 |
| Heart Rate (Beats/Minute) | -0.017 | (-0.019 - | -0.016) | < 0.001 | -0.001 | (-0.002 - | 0.000) | 0.002 |
| LDL cholesterol (mg/dL x1000) | 0.355 | (-0.065 - | 0.775) | 0.098 | -0.163 | (-0.354 - | 0.029) | 0.096 |
| HDL cholesterol (mg/dL x1000) | 0.013 | (-1.074 - | 1.099) | 0.981 | -0.519 | (-1.015 - | -0.024) | 0.040 |
| Triglycerides (mg/dL x1000) | -0.009 | (-0.239 - | 0.222) | 0.942 | -0.099 | (-0.204 - | 0.006) | 0.064 |
| Total intentional exercise (MET-Min/Week x600) | 0.000 | (-0.003 - | 0.004) | 0.901 | 0.002 | (0.000 - | 0.004) | 0.013 |
| Fasting glucose (mg/dL x1000) | -0.030 | (-0.560 - | 0.499) | 0.911 | -0.306 | (-0.548 - | -0.065) | 0.013 |
| Study Site |  |  |  |  |  |  |  |  |
| Columbia | 0.085 | (0.036 - | 0.134) | 0.001 | 0.063 | (0.040 - | 0.085) | < 0.001 |
| Johns Hopkins | -0.097 | (-0.144 - | -0.049) | < 0.001 | 0.042 | (0.020 - | 0.063) | < 0.001 |
| Minnesota | -0.107 | (-0.157 - | -0.057) | < 0.001 | 0.086 | (0.063 - | 0.109) | < 0.001 |
| Northwestern | 0.127 | (0.080 - | 0.173) | < 0.001 | 0.036 | (0.015 - | 0.058) | 0.001 |
| UCLA | 0.048 | (-0.003 - | 0.098) | 0.065 | 0.045 | (0.022 - | 0.068) | < 0.001 |
| Waist-to-Hip Ratio |  |  |  |  |  |  |  |  |
| 0.85-0.99 | -0.019 | (-0.079 - | 0.041) | 0.527 | 0.030 | (0.003 - | 0.057) | 0.032 |
| ≥1.00 | -0.030 | (-0.122 - | 0.061) | 0.519 | -0.001 | (-0.043 - | 0.041) | 0.970 |
| Age category at Exam 1 |  |  |  |  |  |  |  |  |
| 55 - 64 | -0.086 | (-0.164 - | -0.008) | 0.030 | -0.056 | (-0.092 - | -0.021) | 0.002 |
| 65 - 74 | -0.066 | (-0.152 - | 0.021) | 0.137 | -0.078 | (-0.118 - | -0.039) | < 0.001 |
| 75 - 84 | -0.133 | (-0.256 - | -0.010) | 0.034 | -0.085 | (-0.141 - | -0.029) | 0.003 |
| WHR 0.85 – 0.99 & Age 55 – 64 | 0.068 | (-0.020 - | 0.156) | 0.130 | -0.037 | (-0.077 - | 0.004) | 0.074 |
| WHR ≥ 1.00 & Age 55 – 64 | 0.069 | (-0.052 - | 0.190) | 0.266 | 0.017 | (-0.038 - | 0.072) | 0.549 |
| WHR 0.85 – 0.99 & Age 65 – 74 | 0.006 | (-0.089 - | 0.101) | 0.899 | -0.078 | (-0.121 - | -0.035) | < 0.001 |
| WHR ≥ 1.00 & Age 65 – 74 | -0.033 | (-0.155 - | 0.090) | 0.603 | -0.048 | (-0.104 - | 0.008) | 0.094 |
| WHR 0.85 – 0.99 & Age 75 – 84 | -0.024 | (-0.156 - | 0.108) | 0.716 | -0.098 | (-0.158 - | -0.038) | 0.001 |
| WHR ≥ 1.00 & Age 75 – 84 | 0.126 | (-0.033 - | 0.286) | 0.120 | -0.092 | (-0.164 - | -0.019) | 0.014 |

* C1 = large artery elasticity; C2 = small artery elasticity; SVR = systemic vascular resistance; LDL = low-density lipoprotein; HDL = high-density lipoprotein; MET = metabolic equivalent; WHR = waist-to-hip ratio. Reference categories are in angle brackets.
